1        **Bacteriophage activity against and characterisation of avian pathogenic**

2                    ***Escherichia coli* isolated from colibacillosis cases in Uganda**

3        George Kazibwe<sup>1</sup>, Phionah Katami<sup>1</sup>, Ruth Alinaitwe<sup>1</sup>, Stephen Alafi<sup>1</sup>, Ann Nanteza<sup>1</sup> and Jesca  
4        Lukanga Nakavuma<sup>1\*</sup>

5        <sup>1</sup>School of Biosecurity, Biotechnical and Laboratory Sciences, College of Veterinary Medicine,  
6        Animal Resources and Biosecurity, Makerere University. P.O. Box 7062, Kampala Uganda

7        \* Author for correspondence

8        E-mail: [JLNakavuma@covab.mak.ac.ug](mailto:JLNakavuma@covab.mak.ac.ug), [Jesca.Nakavuma@gmail.com](mailto:Jesca.Nakavuma@gmail.com) (JLN)

9        Department of Biomolecular and Biolab Sciences

10        College of Veterinary Medicine, Animal Resources and Biosecurity, Makerere University

11        George Kazibwe – [gkazibwe@gmail.com](mailto:gkazibwe@gmail.com); Tel +256 773 474100

12        Phionah Katami – [katyphionah9@outlook.com](mailto:katyphionah9@outlook.com), [katyphionah@gmail.com](mailto:katyphionah@gmail.com); Tel +256 706 338230

13        Ruth Alinaitwe – [alinaitweruth21@gmail.com](mailto:alinaitweruth21@gmail.com); Tel +256 778 264808

14        Stephen Alafi – [alianasteven22@gmail.com](mailto:alianasteven22@gmail.com); Tel +256 783 528106

15        Ann Nanteza – [nantezaa@covab.mak.ac.ug](mailto:nantezaa@covab.mak.ac.ug), [nantezaann11@gmail.com](mailto:nantezaann11@gmail.com); Tel +256 772 443584

16        Jesca L. Nakavuma - [JLNakavuma@covab.mak.ac.ug](mailto:JLNakavuma@covab.mak.ac.ug), [Jesca.Nakavuma@gmail.com](mailto:Jesca.Nakavuma@gmail.com); Tel +256  
17        772 434097

18

## 19 **Abstract**

20           A laboratory-based study aimed at establishing a stock of avian pathogenic *Escherichia*  
21 *coli* (APEC) lytic bacteriophages, for future development of cocktail products for controlling  
22 colibacillosis as well as minimizing use of antimicrobial drugs in the poultry production systems  
23 in Uganda. Specifically, the study determined the antibiotic susceptibility; phylogenetic  
24 categories, occurrence of selected virulence genes among *Escherichia coli* stock isolates from  
25 cases of chicken colibacillosis; and isolation of specific bacteriophages. Fifty six isolates were  
26 confirmed as *E. coli* by standard phenotypic tests. All the 56 (100%) isolates were resistant to at  
27 least one antibiotic while 50 (89.3%) isolates were resistant to at least three classes of antimicrobial  
28 drugs and were therefore designated as multi-drug resistant. Phylogenetically, APEC isolates  
29 mainly belonged to phylogroups A and D which represented 44.6% and 39.3%, respectively.  
30 Virulence genes, *ompT* and *iutA* were the most frequent with 33 (58.9%) and 32 (57.1%) isolates  
31 respectively; while *iroN* least occurred in 23 (41.1%) isolates. Of the 56 isolates, 69.6% harbored  
32 at least one virulence gene, while 50% had at least four virulence genes; hence confirmed as APEC.  
33 None of the isolates belonged to the selected serotypes O1, O2 and O78. Seven specific  
34 bacteriophages were isolated and their host range, varied from 1.8% to 17.9% (n=56 APEC  
35 isolates), while the combined lytic spectrum of all the phages was 25%. Phage stability was  
36 negatively affected by increasing temperatures with both UPEC04 and UPEC10 phages becoming  
37 undetectable at 70°C; however activity was detected between pH 2 and 12. The high occurrence  
38 of APEC isolates with resistance against the commonly used antibiotics supports the need for  
39 alternative strategies of bacterial infections control in poultry. The low host range exhibited by the  
40 phages calls for search for more candidates before more in-depth studies are done for phage  
41 characterization and application.

42 Keywords: APEC; virulence genes; phylogenetic groups; antibiotic susceptibility; bacteriophage

## 43 **1. Introduction**

44 Avian colibacillosis refers to any localized or systemic infection caused by Avian  
45 Pathogenic *Escherichia coli* (APEC) belonging to several serogroups; and remains one of the most  
46 prevalent bacterial diseases affecting the poultry industry worldwide [1]. In Uganda, colibacillosis  
47 is the most frequent bacterial infection among the chicken samples submitted to the Central  
48 Diagnostic Laboratory with a prevalence of 14% [2]. Majalija *et al* (2010) reported 87%  
49 *Escherichia coli*, isolated from broiler farms kept under the deep litter system, being resistant to  
50 at least one antimicrobial agent [3].

51 *Escherichia coli* strains possess various virulence factors for extra-intestinal survival [4–  
52 8]. However, capacity to cause disease in a specific host species, depends on acquisition of  
53 appropriate virulence gene combination by a given *E. coli* strain [5]. The number of detected genes  
54 can be used as a reliable index of their virulence; and strains typed as APEC possess five to eight  
55 genes, while the non-APEC ones harbor less than four genes [5,8]. Virulence-associated genes,  
56 namely, *iutA*, *hlyF*, *iss*, *iroN*, and *ompT* were suggested as the minimum that can be used to identify  
57 an APEC strain with the highest pathogenicity [9].

58 Bacterial diseases of significance in animal production systems affect productivity, may be  
59 zoonotic and some have been associated with drug resistant pathogens [6,10]. The high occurrence  
60 of drug resistant organisms warrants search for alternative strategies, such as, use of  
61 bacteriophages, in management of bacterial infections, like colibacillosis. Bacteriophages are  
62 naturally occurring viruses in the environment that routinely control bacterial populations [11].  
63 The specific action against bacteria, self-replicating and self-limiting nature; makes bacteriophages

64 attractive alternatives to antibiotics to prevent and treat bacterial diseases. Phages have been  
65 applied in control of various bacterial agents; including the drug resistant strains. Bacteriophages  
66 are increasingly explored as non-antibiotic strategies for control of bacterial diseases in  
67 agricultural systems for food safety and security [12–14]. In some developed countries, phages  
68 have been approved and are commercially available for use, especially in management of  
69 microbial contamination of plant-based foods [15]. In poultry, phages have demonstrated  
70 effectiveness; and some e.g. ListShield™ from Intralytix, Inc; have been approved by the United  
71 States Food and Drug Administration (FDA) for managing bacterial infections including *E. coli*  
72 (EcoShield™) [12,16,17].

73         The APEC strains circulating on poultry farms in Uganda have neither been characterized  
74 nor the virulence genes they harbor documented. Unlike most poultry diseases, there are no  
75 vaccines for controlling colibacillosis, hence its management depends on hygienic measures as  
76 well as use of antibacterial agents. Antibiotic use is associated with resistance development and  
77 undesirable drug residues in the poultry products; which calls for alternative antimicrobial  
78 strategies. The research aimed at establishing a stock of APEC lytic bacteriophages, for future  
79 development of cocktail products for controlling colibacillosis as well as minimizing use of  
80 antimicrobial drugs in the poultry production systems in Uganda. Specifically, the *E. coli* isolates  
81 associated with cases of poultry colibacillosis were characterized by drug susceptibility,  
82 phylogenetic group and the virulent genes harbored. The research also sought to establish presence  
83 of APEC serotypes O1, O2 and O78; and stock of lytic bacteriophages that specifically target  
84 APEC.

## 85 **2. Materials and Methods**

### 86 **2.1 Bacterial isolates**

87 Previously archived APEC isolates from post-mortem samples of colibacillosis suspect  
88 chicken collected between 2017 and 2018 from poultry farms around Kampala district were used  
89 for the study. The isolates had been stored at the microbiology laboratory of the College of  
90 Veterinary Medicine, Animal Resources and Biosecurity, Makerere University. Identity of 56  
91 *Escherichia coli* isolates was confirmed by standard bacteriological and biochemical methods.

### 92 **2.2 Antimicrobial susceptibility testing**

93 Antimicrobial susceptibility testing was carried out by the Disk diffusion method [18], as  
94 recommended by the Clinical and Laboratory Standards Institute [19]. Twelve antibiotics,  
95 including Tetracycline 25mcg, Chloramphenicol 5mcg, Nalidixic acid 30mcg, Ampicillin 10mcg,  
96 Streptomycin 10mcg, Co-trimoxazole 25mcg, Ciprofloxacin 5mcg, Penicillin G 10mcg, Cefixime  
97 30mcg, Amoxicillin 30mcg, Nitrofurantoin 300mcg, and Gentamicin 30mcg (Bioanalyse®) were  
98 tested on Mueller-Hinton agar. Growth-inhibition zones were recorded and interpreted as  
99 susceptible (S), intermediate (I), and resistant (R). An *E. coli* reference strain (ATCC 25922) was  
100 used for quality control of the test.

### 101 **2.3 DNA extraction**

102 Template DNA was extracted using the boiling method as described by Wang *et al* [20].  
103 Briefly, bacteria DNA was prepared by suspending one colony of the isolate in 100µL of distilled  
104 water. The suspension was rapidly boiled in a water bath at 95°C for 10 minutes and then cooled  
105 to room temperature. The cool suspension was then centrifuged (Eppendorf centrifuge 5424R,

106 Germany) for 3 minutes at 12000rpm to remove cell debris; and the supernatant stored at -20°C  
107 formed the stock from which aliquots of template DNA were obtained for use in PCR.

## 108 **2.4 Detection of the virulence genes and determination of** 109 **phylogroups and serogroups of APEC using PCR**

110 Amplification of the selected *E. coli* virulence genes was carried out following a method  
111 described by Johnson *et al* [9]. The positive controls used in PCR assays were *E. coli* strains  
112 BEN2268, BEN2908 which were kindly provided by Dr. Catherine Schouler.

113 A triplex PCR was carried out following a method described by Clermont *et al* [21] to  
114 determine the phylogenetic groups of the APEC isolates; where four major phylogenetic groups  
115 (A, B1, B2 and D) were targeted. The *E. coli* K-12 (phylogroup A), STEC O111 (phylogroup B1),  
116 and O157:H7 (phylogroup D) were used as positive controls.

117 Serogroup identification was done using an allele-specific PCR assay with primers  
118 designed for the most common serotypes (O1, O2 and O78) as described by Wang *et al* [22]. *E.*  
119 *coli* strains BEN2268 and BEN2908 were used as positive controls with nuclease free water used  
120 as the negative control. The primers and the PCR conditions used are listed in the supplementary  
121 files (S1-S3 Appendices).

## 122 **2.5 Isolation of bacteriophages**

123 *Escherichia coli* specific phages were isolated through enrichment, from effluent and  
124 chicken droppings that were obtained from three selected chicken houses and slaughter places  
125 around Kampala district. The phage isolation process followed the procedure described by Oliveira  
126 *et al* [23] with slight modifications including use of Tryptic soy broth (TSB) (Condalab, Madrid,

127 Spain) instead of Luria Bertani broth (LB). Briefly, 50g of the faecal samples were homogenized  
128 in 50 ml of Tryptic soy broth (TSB). The effluent (50 ml) and the homogenised samples were  
129 centrifuged at 10,000 ×g for 10 min. The supernatant was filtered through a 0.45µm membrane  
130 (ADVANTEC®, USA) and 10 ml of the filtrate was added to 10 ml of double strength TSB  
131 containing 40µL of 1M Calcium Chloride (CaCl<sub>2</sub>). Then 100µL of overnight *E. coli* ATCC 25922  
132 broth culture was added for enrichment. The mixture was incubated at 30°C for up to 48 hours on  
133 a shaker (New Brunswick™ Innova® 40, Germany) at 120 rev/min; after which it was centrifuged  
134 at 7000 rpm (Hermle Z32K, Germany) for 5 mins at 4°C. The supernatant was then filtered through  
135 0.45µm syringe filters. Presence of phages was determined using the spot assay method.

## 136 **2.6 Spot assay method**

137 A spot assay was carried out as described by Mirzaei & Nilsson [24] with slight  
138 modifications. Briefly, the soft agar overlay was prepared by mixing 100 µL of an overnight *E.*  
139 *coli* broth culture with 5mL of TSB containing 0.7% agar maintained in the molten form in a water  
140 bath at 45°C. The agar overlay was poured on to base plates containing 20–30mL of Tryptic Soy  
141 Agar (TSA) (Condalab, Madrid, Spain) with 1.5% agar and then swirled to allow uniform spread.  
142 On solidifying, 10 µL of the phage filtrate was spotted on top of the soft agar and allowed to dry.  
143 The plates were examined for lysis or plaque formation after overnight incubation at 37°C. A clear  
144 zone indicated presence of phage.

## 145 **2.7 Purification of bacteriophages**

146 Phage purification was done using the agar overlay technique as described by Oliveira *et*  
147 *al* [23], with some modifications. The method employed base plates, containing 20–30mL of TSA  
148 with 1.5% agar and soft agar overlays composed of TSB with 0.7% agar. Ten-fold serial dilutions

149 (10<sup>0</sup> - 10<sup>-9</sup>) of the above filtered phages were prepared using the phage SM buffer (0.05M Tris,  
150 0.1M NaCl, 0.008M MgSO<sub>4</sub>, 0.01% w/v gelatin, pH 7.5). Equal volumes (100 µL) of the diluted  
151 phage and of overnight host *E. coli* were mixed with 5mL of soft agar overlay, spread onto TSA  
152 plates and incubated overnight at 37°C. Phages were purified by successive single plaque isolation,  
153 from the higher dilutions plates where plaques were distinct. A single plaque was picked from the  
154 bacteria lawn, suspended into an overnight host *E. coli* culture, incubated overnight at 37°C and  
155 the lysate plated as described above. After repeating the cycle three more times, lysates from single  
156 plaques were centrifuged at 5000 g for 5 min. The phages were recovered from the supernatant by  
157 filtering through a 0.45 µm membrane. Purified phages were stored in SM buffer at 4°C for  
158 working stock, while for long term-storage, phage stocks were stored in 1 ml aliquots at -80°C in  
159 7% Dimethyl Sulfoxide (DMSO).

## 160 **2.8 Determination of phage titres by agar overlay method**

161 Phage concentration (titre) was determined using a method described by Carey-Smith *et al*  
162 [25] with some modifications. Tryptic Soy broth instead of Luria Bertani broth was used as the  
163 culture medium. Ten-fold serial dilutions (10<sup>0</sup> – 10<sup>-8</sup>) of the purified phages were prepared using  
164 SM buffer. Overlays (5ml) were inoculated with 100 µL of overnight host *E. coli* and poured on a  
165 base plate previously marked in a grid to allow identification of each phage dilution. Once the  
166 overlay was gelled and dried, 10 µL of each phage dilution was spotted. The plates were incubated  
167 at 37°C, and examined for plaques after 24 hours. Distinct plaques obtained from the lowest  
168 dilution were counted and used to calculate the phage titre. The titres were expressed as plaque  
169 forming units (PFU) per ml.



## 170 **2.9 Bacteriophage host range determination**

171 Bacteriophage activity was tested on 56 APEC isolates using the spot assay method as  
172 described above. Presence of clear zones indicated sensitivity of a given APEC isolate to the lytic  
173 activity of the phage. Out of the seven phages, two phages with the broadest host ranges were  
174 selected for pH and thermal stability testing.

## 175 **2.10 pH and thermal stability test**

176 pH stability and thermal stability tests were carried out for the two phages with the broadest  
177 host ranges as described by Jung *et al* and Yu *et al* [26,27]. Briefly, the phages ( $10^8$  PFU/ml) were  
178 incubated at different temperatures (20°C to 70°C ) for 30 mins. This range of temperatures was  
179 selected because it encompasses both the room temperature and body temperature of chicken  
180 among other temperatures. Afterwards, the phage suspensions were immediately placed in an ice  
181 bath.

182 The pH stability of the phages was evaluated using SM buffer solution adjusted to the  
183 required pH using concentrated hydrochloric acid (HCl) or Sodium hydroxide (NaOH). The  
184 phages ( $10^8$  PFU/ml) were subjected to different ranges of pH from 2 to 12 for 30 mins at 25°C  
185 and at 40°C. The two temperatures were selected to represent the room temperature and the body  
186 temperature of chicken respectively; while pH was studied because it affects phage adsorption  
187 onto the bacteria and its subsequent propagation. Afterwards, the phage suspensions were  
188 immediately diluted with the SM buffer to limit further exposure. After both the heat and pH  
189 treatment, viable phages were quantified using the agar overlay method as described above. All  
190 assays were performed in duplicates.

## 191 **2.11 Research approval**

192           The study was endorsed by the Higher Degrees Research Committee of the College of  
193 Veterinary Medicine, Animal Resources and Biosecurity of Makerere University.

194

195

196

197

198

199

200

201

202

203

204

205

206

207

208

209

210

211

212

213

## 214 **3. Results**

### 215 **3.1 Antimicrobial susceptibility testing**

216 All the 56 (100%) isolates exhibited resistance to at least one antibiotic. Fig 1 presents the  
217 proportion of resistant isolates for each of the tested antibiotic. High frequency of resistance was  
218 encountered for the antibiotics: Penicillin G (100%), Sulphamethoxazole/Trimethoprim (87.5%),  
219 Tetracycline (83.9%), Ampicillin (80.4%), Amoxicillin (69.6%), Streptomycin (67.9%) and  
220 Nalidixic acid (60.7%). Average frequency of resistance was found in case of Chloramphenicol  
221 (35.7%). Low frequency of resistance was revealed in case of Gentamicin (10.7%) and  
222 Nitrofurantoin (8.9%); while all the 56 (100%) isolates were susceptible to Cefixime. Resistance  
223 to at least three antimicrobial drug classes; and hence multi-drug resistance (MDR), was  
224 encountered in 50 (89.3%) isolates.

225 **Fig 1. Antimicrobial susceptibility test results for Avian Pathogenic *E. coli*.** The bars represent  
226 the percentages of the 56 APEC isolates that were resistant, intermediate or susceptible to the 12  
227 antibiotics as determined by the Disk diffusion method.

228 CIP – Ciprofloxacin, P- Penicillin G, CFM – Cefixime, SXT - Sulphamethoxazole/Trimethoprim,  
229 C- Chloramphenicol, AX – Amoxillin, F – Nitrofurantoin; S – Streptomycin, NA - Nalidixic acid,  
230 AM - Ampicillin, TE- Tetracycline, CN – Gentamicin

### 231 **3.2 Phylogenetic groups of the APEC isolates**

232 The multiplex PCR amplification targeting the *ChuA*, *yjaA* and TspE4.C2 genes  
233 categorized the 56 APEC isolates into phylogenetic groups A, B1, B2 and D with 25 (44.6%),

234 eight (14.3%), one (1.8%) and 22 (39.3%) isolates, respectively. Table 1 presents the genes and/or  
 235 their combinations, the phylogenetic group and proportion of the *E. coli* isolates in each category.

236 **Table 1. Phylogenetic groups of the APEC suspect isolates**

| <i>ChuA</i> | <i>yjaA</i> | TSPE4.C2 | Phylogroup assignment | Frequency n = 56 (100%) |
|-------------|-------------|----------|-----------------------|-------------------------|
| -           | +/-         | -        | A                     | 25 (44.6)               |
| -           | -           | +        | B1                    | 8 (14.3)                |
| +           | +           | +/-      | B2                    | 1 (1.8)                 |
| +           | -           | +/-      | D                     | 22 (39.3)               |

237 (+) Presence of gene; (-) Absence of gene

### 238 3.3 Frequency of APEC virulence genes

239 Table 2 presents the frequency of the APEC isolates harboring the selected virulence genes,  
 240 that is, *iroN*, *ompT*, *hlyF*, *iss*, and *iutA*. Out of the 56 isolates, 39 (69.6%) had at least one virulence  
 241 gene. The virulence genes *ompT* and *iutA* had the highest prevalence at 33 (58.9%) and 32 (57.1%)  
 242 respectively with *iroN* having the lowest prevalence at 23 (41.1%). Of the 56 isolates, only 28  
 243 (50%) harboured four or more virulence genes and thus confirmed as APEC.

244 **Table 2. Frequency of the selected virulence genes among the APEC suspect isolates**

| Gene        | Description                            | Frequency n = 56 (100%) |
|-------------|----------------------------------------|-------------------------|
| <i>iutA</i> | Aerobactin siderophore receptor gene   | 32 (57.1)               |
| <i>iss</i>  | Episomal increased serum survival gene | 31 (55.4)               |

---

|             |                                       |           |
|-------------|---------------------------------------|-----------|
| <i>hlyF</i> | Putative avian hemolysin              | 31 (55.4) |
| <i>ompT</i> | Episomal outer membrane protease gene | 33 (58.9) |
| <i>iroN</i> | Salmochelin siderophore receptor gene | 23 (41.1) |

---

245

246 With respect to presence of at least one virulence gene in relation to the phylogroup; 14  
247 out of 25 in group A, 5 out of 8 in group B and 19 out of 22 in group D, had virulence genes (Fig  
248 2).

249 **Fig 2. Virulence gene content of APEC isolates within each phylogenetic group.** The dark bars  
250 indicate the proportion of APEC isolates within a phylogenetic group that had virulence genes  
251 while the white ones indicate those without virulence genes.

### 252 **3.4 Serological genotyping**

253 Of the 56 isolates, none generated amplicons of sizes expected for the O1, O2 and O78  
254 serogroups (Fig 3).

255 **Fig 3. Agarose gel showing PCR amplicons from selected APEC isolates for Serogroup**

256 **O78.** Lane M: DNA marker (100bp DNA ladder, ThermoFisher Scientific); Lanes 1-10: APEC  
257 isolates; Lane 11: APEC strain BEN2268 (positive control).

### 258 **3.5 Phage isolates and their host range**

259 A total of 10 crude phage isolates were obtained but seven were successfully purified. The  
260 purified phages were code-named as UPEC01, UPEC03, UPEC04, UPEC06, UPEC08, UPEC09  
261 and UPEC10. The phage host range, as exhibited by lytic activity against 56 APEC isolates varied  
262 from one (1.8%) to 10 (17.9%). Phage UPEC04 had the broadest host range, inhibiting 10 (17.9%)

263 APEC isolates followed by UPEC06 and UPEC10 at 6 (10.7%) isolates each, then UPEC03 at 5  
264 (8.9%) isolates, UPEC01 and UPEC08 at 4 (7.1%) isolates each; while UPEC09 had the narrowest  
265 host range of 1 (1.8%) isolate. Only 14 (25%) APEC isolates out of the 56 were sensitive to any  
266 one phage and the combined lytic spectrum of UPEC04 and UPEC10 phages includes all the total  
267 APEC isolates that were sensitive. Therefore UPEC04 and UPEC10 phages were selected for  
268 further analysis. Out of the 14 APEC isolates sensitive to the phages, 11 were multi drug resistant.  
269 The phage sensitivity pattern of the seven phages on the 14 APEC isolates is presented in S1 Table.

### 270 **3.6 Thermal and pH stability of UPEC04 and UPEC10 phages**

271 Phages UPEC04 and UPEC10 were selected for further investigation because the combined  
272 lytic activity of the two yielded the maximum host range of 14 out of the 56 tested APEC isolates.  
273 Therefore, the heat sensitivity of these two phages was determined for temperatures ranging from  
274 20°C - 70°C (Fig 4). The phages were stable to heat with only slight reductions in titers up to 50°C,  
275 followed by a steep decline up to 70°C; beyond which they were undetectable. The highest titers  
276 were obtained between 20°C – 50°C making this the range of temperature at which the two phages  
277 are most stable.

278 **Fig 4. Effect of temperature on UPEC04 and UPEC10 phage viability.** Phage viability was  
279 determined by obtaining the phage titers at the different temperatures using the agar overlay  
280 method. Values are an average for duplicate tests.

### 281 **3.7 Effect of pH on phage titer**

282 The stability of UPEC04 and UPEC10 to pH ranges from 2 to 12 at both 25°C and 40°C is  
283 presented in Fig 5. The phages retained viability across the different pH values with the lowest  
284 titers registered at the extremes of pH (2 and 12), while the highest titers were registered between

285 pH 4 and 8. The changes in the titers followed a similar pattern at the two temperatures, though  
286 the titers were consistently higher at 25°C compared to 40°C.

287 **Fig 5. Effect of pH on phage viability at 25°C and 40°C.** A) Phage UPEC04. B) Phage UPEC10.  
288 Phage viability was determined by obtaining the phage titers at the different pH using the agar  
289 overlay method. Values are an average for duplicate tests.

290

291

292

293

294

295

296

297

## 298 **4. Discussion**

299 The APEC isolates showed high resistance to commonly used antibiotics in poultry like  
300 tetracycline, ampicillin and cotrimoxazole. This high level resistance has been reported in *E. coli*  
301 from poultry and other sources [3,28]. This is likely to be as a result of irrational drug use,  
302 especially among the poultry farmers and use of antibiotic supplemented feeds. Indeed, in Uganda,  
303 Bashahun & Odoch (2015) reported that 96.7% of the poultry farmers frequently used antibiotics  
304 for prevention and control of infectious diseases while 33.3% used the antibiotics to promote

305 growth and enhance feed efficiency [29]. Resistance to antibiotics not commonly used in animal  
306 production systems, such as chloramphenicol was unexpected but the ease of access without a  
307 valid prescription to human drugs over the counter in pharmacies results in their misuse in animals  
308 [30]. The latter is likely to be the explanation for the average frequency of resistance that was  
309 encountered in case of Chloramphenicol (35.7%). Low frequency of resistance was revealed in  
310 case of Gentamicin (10.7%) and Nitrofurantoin (8.9%); while all the 56 (100%) isolates were  
311 susceptible to Cefixime. Susceptibility of all the isolates to Cefixime, could be due to the fact that  
312 this is a recently introduced antibiotic, quite expensive and not readily available to the farmers.  
313 This is in agreement with a study done by Dou *et al* (2015) who found out that there was low  
314 resistance towards newly developed drugs [31]. A high rate of multidrug resistance has also been  
315 reported elsewhere [10,31,32].The high level of antimicrobial resistance of APEC demonstrated  
316 in this study calls for stringent regulations on antibiotic use on poultry farms. Additionally, due to  
317 the challenges of developing new antibiotics, the high resistance rates reiterates the need to  
318 introduce alternatives to drug use, such as the bio-control agents, like the bacteriophages.

319 Phylogenetic typing determines the genetic background or ancestry of an organism as well  
320 as differentiating between the pathogenic *E. coli* strains (B2 and D) from commensals (A and B1)  
321 [33,34]. Overall, phylogenetic analysis of APEC strains in this study revealed that majority  
322 belonged to Phylogenetic groups A and D. This is in agreement with several studies done  
323 elsewhere [20,28,35,36]. Johnson *et al* (2008) found out that majority of the APEC isolates  
324 characterized belonged to A, B1 and D phylogenetic groups [9]. The 11 isolates from group A and  
325 the three isolates from group B1 that lacked the virulence genes but were isolated from  
326 colibacillosis suspect birds probably harbored other virulence genes that were not tested for during  
327 the current study or they were just opportunistic. This is in agreement with Picard *et al* (1999) who



328 found out that some strains of *E. coli* belonging to Phylogenetic groups A and B1 exhibiting  
329 commensal characteristics would cause disease [37]. The 14 and five isolates from group A and  
330 B1, respectively; that possessed virulence genes could have acquired them by horizontal gene  
331 transfer from the pathogenic strains [31,38]. The three isolates from phylogroup D that lacked the  
332 tested virulence genes probably caused colibacillosis by possessing other virulence genes not  
333 screened for in this study. The above findings agree with other studies that demonstrated diversity  
334 of Phylogenetic groups among APEC [39,40].

335         The selected virulence genes occurred in 69.6% of the *E. coli* isolates with varying  
336 frequencies; indicating that they were potentially pathogenic. However, only 50% of the isolates  
337 that had four or more genes can be categorized as APEC according to Johnson *et al* [9]. The  
338 findings are supported by Kuhnert *et al* who concluded that pathogenicity of a given *E. coli* strain  
339 is mainly determined by specific virulence factors which include adhesins, invasins, toxins and  
340 capsule [41]. Seventeen isolates (30.4%) did not exhibit a single virulence gene. These isolates  
341 could have been commensals that had become opportunistic due to host-dependent factors like  
342 other infections, environmental stress, poor nutrition and hygiene [37,39,42]. Alternatively, these  
343 isolates could be harboring other virulence genes that were not screened for in the present study  
344 [9,32]. Several studies show that it is rare for all the virulence genes to be present in the same  
345 isolate [20,31,43]. For instance, Delicato *et al* reported that 27.5% of the colibacillosis-derived  
346 isolates did not possess any of the virulence-associated genes investigated [44].

347         The Episomal outer membrane protease gene (*ompT*) showed the highest prevalence at  
348 58.9%. This gene encodes a protease that cleaves colicin, an inhibitory protein produced by other  
349 *E. coli* [45]. The *ompT* gene is located on the ColV plasmid alongside other virulence genes like

350 *iss*, *hlyF* and *iroN* [46]. A relatively high number of isolates harbored the *ompT* gene for protection  
351 against colicin produced by other *E. coli*.

352 The lowest frequency was shown by Salmochelin siderophore receptor gene (*iroN*) at  
353 41.1%. Like the *ompT* gene, *iroN* is located on the ColV plasmid and is one of the genes  
354 responsible for iron acquisition [45,46]. Presence of virulence genes distinguishes APEC from  
355 commensals and as a result these can be used as molecular markers for detection of colibacillosis  
356 in combination with other diagnostic tools [47]. However, there is need to determine whether the  
357 various isolates from this study are capable of establishing an infection in order to confirm their  
358 pathogenicity.

359 Out of the 56 APEC isolates, none belonged to the serogroups O1, O2 and O78 which were  
360 reported to be the most common [48]. This means that the above serogroups are not common  
361 among APEC infecting chicken around Kampala. This can be explained by the fact that  
362 distribution of serogroups varies from one region to another and that the APEC serogroups O1, O2  
363 and O78 may not be as common as indicated in other countries like China [20,31]. Indeed, Riaz *et*  
364 *al* reported occurrence of serogroups O1 and O2 but not O78 [49]. Ewers *et al* also demonstrated  
365 that colibacillosis can be associated with serogroups other than O1, O2 and O78 [38]. Over 100  
366 APEC serogroups have been reported and most of the previous research was carried out in Europe,  
367 Asia and some in Brazil, which are geographically distant from Uganda [20,31,48]. The difference  
368 in the prevalent serogroups is not unexpected and infers that vaccines against avian colibacillosis  
369 developed elsewhere may not offer protection to chicken in Uganda.

370 From the findings regarding host range, no single phage was able to lyse all the studied  
371 APEC strains. The maximum number that could be lysed was 14 out of 56 (25%). This is because  
372 phages are highly specific towards their hosts [50]. This is in agreement with other studies that

373 demonstrated that phages usually have a limited host range [25,51]. Having a relatively broad host  
374 range is one of the desirable properties for selection of candidates for phage therapy [52]. The two  
375 phages, UPEC04 and UPEC10, which had a combined lytic activity against 14 APEC isolates are  
376 better candidates for formulation of cocktails for therapeutic intervention compared to the others.  
377 However, there is need to obtain more phages with a wider host range by using either a mix of  
378 multiple host strains of the same species for phage isolation or growth on multiple hosts  
379 sequentially, that is, one host at a time [52]. Lysis of the eleven multi-drug resistant APEC isolates  
380 by the phages demonstrates the potential of phages in controlling infections caused by multi drug  
381 resistant bacteria.

382         The main physical factors affecting phage adsorption and growth include pH and  
383 temperature [53]. The different pH and temperature ranges in this study were selected to mimic  
384 those that would be encountered during the handling and application of these phages as therapeutic  
385 or sanitizing bio-control agents on poultry farms. Both UPEC04 and UPEC10 were stable to heat  
386 up to 60°C. At 70°C, the phages were inactivated which is in agreement with Lu *et al* (2003) and  
387 Shende *et al* (2017) who reported that phages get inactivated at 70°C and above [51,53].

388         The effect of pH on phage viability at 25°C and at 40°C represented activity at room  
389 temperature and body temperature of chicken, respectively. The two phages were tolerant to a  
390 broad range of pH similar to what was observed in previous studies [26]. The tolerance to a broad  
391 range of temperature and pH coupled with a wide host range, makes the two phages suitable  
392 potential candidates for a cocktail product that can be used as an alternative to antibiotics in the  
393 control of APEC infections [27].

394

395

396

397

398

399

400

401

## 402 **5. Conclusion**

403           None of the APEC isolates analysed belonged to the most common serotypes O1, O2 and  
404 O78 as reported elsewhere. Over 80% of the strains exhibited multi drug resistance against the  
405 most commonly used antimicrobials. The *E. coli* isolates belonged to various phylogenetic groups,  
406 with the majority belonging to phylogroup A and the minority to phylogroup B2. The selected five  
407 virulence genes were present in 69.6% of the APEC isolates at varying frequencies. Of the seven  
408 phages that were isolated, two had the highest combined host range of 25% and exhibited lytic  
409 activity under a wide range of temperatures and pH, making them potential candidates for a  
410 therapeutic cocktail product.

## 411 **Recommendations**

412           Future studies can be carried out to determine other virulence genes responsible for the  
413 pathogenicity of APEC. There is need to establish the circulating APEC serotypes in Uganda,  
414 hence comprehensive screening for other serotypes is necessary. Further investigations are needed

415 to determine the characteristics of the bacteriophages such as, growth rates, latent times, burst  
416 sizes, morphology and genome sequences before they can be applied as therapeutic agents in the  
417 control of colibacillosis.

## 418 **Acknowledgements**

419 Dr. Wilfred Eneku for availing the post mortem tissues from poultry colibacillosis cases for *E. coli*  
420 isolation; Dr. Catherine Schouler of the Institut National de la Recherche Agronomique (INRA),  
421 France for providing the positive controls used in this study and the poultry farmers where samples  
422 for phage isolation were obtained; are greatly acknowledged.

## 423 **Authors Contributions**

424 GK – Molecular analyses, bacteriophage evaluation; PK – Bacteria and bacteriophage isolation;  
425 RA – Antimicrobial sensitivity testing, bacteriophage evaluation; SA – bacteriophage evaluation;  
426 AN – Molecular analyses; JLN – Conceptualized the research, data analysis. All authors read and  
427 contributed to the drafting of the manuscript.

## 428 **Availability of data and materials**

429 Relevant data generated or analyzed during this study are included in this article and supporting  
430 information files.

## 431 **Ethics approval and consent to participate**

432 Not applicable.

## 433 **Consent for publication**

434 Not applicable.

## 435 **References**

- 436 1. Dziva F, Stevens MP. Colibacillosis in poultry: unravelling the molecular basis of  
437 virulence of avian pathogenic *Escherichia coli* in their natural hosts. *Avian Pathol.*  
438 2008;37: 355–366. doi:10.1080/03079450802216652
- 439 2. Byaruhanga J, Tayebwa DS, Eneku W, Afayoa M, Mutebi F, Ndyanabo S, et al.  
440 Retrospective study on cattle and poultry diseases in Uganda. *Int J Vet Sci Med.* 2017;5:  
441 168–174. doi:10.1016/j.ijvsm.2017.07.001
- 442 3. Majalija S, Oweka F, Wito GS, Musisi L, Vudriko P, Nakamya F. Antibiotic  
443 Susceptibility Profiles of Fecal *Escherichia coli* Isolates from Dip-Litter Broiler Chickens  
444 in Northern and central Uganda. *Vet Res.* 2010;3: 75–80.
- 445 4. Cortes P, Vanessa B, Mora A, Dahbi G, Blanco JE, Blanco M, et al. Isolation and  
446 Characterization of Potentially Pathogenic Antimicrobial-Resistant *Escherichia coli*  
447 Strains from Chicken and Pig Farms in Spain. *Appl Environ Microbiol.* 2010;76: 2799–  
448 2805. doi:10.1128/AEM.02421-09
- 449 5. Schouler C, Schaeffer B, Brée A, Mora A, Dahbi G, Biet F, et al. Diagnostic strategy for  
450 identifying avian pathogenic *Escherichia coli* based on four patterns of virulence genes. *J*  
451 *Clin Microbiol.* 2012;50: 1673–1678. doi:10.1128/JCM.05057-11
- 452 6. Knobl T, Moreno AM, Paixao R, Gomes TA, Vieira M, Leite S, et al. Prevalence of Avian  
453 Pathogenic *Escherichia coli* ( APEC ) Clone Harboring *sfa* Gene in Brazil. *Sci world J.*  
454 2012;2012: 10–13. doi:10.1100/2012/437342
- 455 7. Jeong Y, Kim T, Kim J, Kwon H. Pathotyping avian pathogenic *Escherichia coli* strains in

- 456 Korea. J Vet Sci. 2012;13: 145–152.
- 457 8. Roussan DA, Zakaria H, Khawaldeh G, Shaheen I. Differentiation of Avian Pathogenic  
458 *Escherichia coli* Strains from Broiler Chickens by Multiplex Polymerase Chain Reaction  
459 (PCR) and Random Amplified Polymorphic (RAPD) DNA. Open J Vet Med. 2014;04:  
460 211–219. doi:10.4236/ojvm.2014.410025
- 461 9. Johnson TJ, Wannemuehler Y, Doetkott C, Johnson SJ, Rosenberger SC, Nolan LK.  
462 Identification of minimal predictors of avian pathogenic *Escherichia coli* virulence for use  
463 as a rapid diagnostic tool. J Clin Microbiol. 2008;46: 3987–3996.  
464 doi:10.1128/JCM.00816-08
- 465 10. Subedi M, Bhattarai RK, Devkota B, Phuyal S, Luitel H. Antibiotic resistance pattern and  
466 virulence genes content in avian pathogenic *Escherichia coli* (APEC) from broiler  
467 chickens in Chitwan, Nepal. BMC Vet Res. 2018;14: 4–9. doi:10.1186/s12917-018-1453-9
- 468 11. Abedon ST. Kinetics of Phage-Mediated Biocontrol of Bacteria. Foodborne Pathog Dis.  
469 2009;6.
- 470 12. Doffkay Z, Dömötör D, Kovács T, Rákhely G. Bacteriophage therapy against plant,  
471 animal and human pathogens. Acta Biol Szeged. 2015;59: 291–302.
- 472 13. Gill JJ. Phage applications in animal agriculture and food safety. J Anim Sci. 2016;94:  
473 57–58. doi:10.2527/ssasas2015-118
- 474 14. Arthur TM, Kalchayanand N, Agga GE, Wheeler TL, Koohmaraie M. Evaluation of  
475 Bacteriophage Application to Cattle in Lairage at Beef Processing Plants to Reduce  
476 *Escherichia coli*. Foodborne Pathog Dis. 2016;20: 1–6. doi:10.1089/fpd.2016.2189

- 477 15. Doss J, Culbertson K, Hahn D, Camacho J, Berekzi N. A review of phage therapy against  
478 bacterial pathogens of aquatic and terrestrial organisms. *Viruses*. 2017.  
479 doi:10.3390/v9030050
- 480 16. Miller RW, Skinner EJ, Sulakvelidze A, Mathis GF, Hofacre CL. Bacteriophage therapy  
481 for control of necrotic enteritis of broiler chickens experimentally infected with  
482 *Clostridium perfringens*. *Avian Dis*. 2010;54: 33–40. doi:10.1637/8953-060509-Reg.1
- 483 17. Wernicki A, Nowaczek A, Urban-chmiel R. Bacteriophage therapy to combat bacterial  
484 infections in poultry. *Virol J*. 2017;14: 1–13. doi:10.1186/s12985-017-0849-7
- 485 18. Hudzicki J. Kirby-Bauer Disk Diffusion Susceptibility Test Protocol. *Am Soc Microbiol*.  
486 2016; 1–23.
- 487 19. CLSI. M100-S11, Performance standards for antimicrobial susceptibility testing. *Clin*  
488 *Microbiol Newsl*. 26th ed. 2001;23: 49. doi:10.1016/s0196-4399(01)88009-0
- 489 20. Wang, Liao X, Zhang W, Jiang H, Sun J, Zhang M. Prevalence of Serogroups, Virulence  
490 Genotypes, Antimicrobial Resistance, and Phylogenetic Background of Avian Pathogenic  
491 *Escherichia coli* in South of China. *Foodborne Pathog Dis*. 2010;7.
- 492 21. Clermont O, Bonacorsi S, Bingen E. Rapid and simple determination of the *Escherichia*  
493 *coli* phylogenetic group. *Appl Environ Microbiol*. 2000;66: 4555–4558.  
494 doi:10.1128/AEM.66.10.4555-4558.2000
- 495 22. Wang S, Meng Q, Dai J, Han X, Han Y, Ding C, et al. Development of an allele-specific  
496 PCR assay for simultaneous sero-typing of avian pathogenic *Escherichia coli* predominant  
497 O1, O2, O18 and O78 strains. *PLoS One*. 2014;9: 1–6. doi:10.1371/journal.pone.0096904



- 498 23. Oliveira A, Sillankorva S, Quinta R, Henriques A, Sereno R, Azeredo J. Isolation and  
499 characterization of bacteriophages for avian pathogenic *E. coli* strains. *J Appl Microbiol.*  
500 2009;106: 1919–1927. doi:10.1111/j.1365-2672.2009.04145.x
- 501 24. Mirzaei MK, Nilsson AS. Isolation of phages for phage therapy: A comparison of spot  
502 tests and efficiency of plating analyses for determination of host range and efficacy. *PLoS*  
503 *One.* 2015;10: 1–13. doi:10.1371/journal.pone.0118557
- 504 25. Carey-smith G V, Billington C, Cornelius AJ, Hudson JA, Heinemann JA. Isolation and  
505 characterization of bacteriophages infecting *Salmonella* spp . 2006;258: 182–186.  
506 doi:10.1111/j.1574-6968.2006.00217.x
- 507 26. Jung L seung, Ding T, Ahn J. Evaluation of lytic bacteriophages for control of multidrug-  
508 resistant *Salmonella* Typhimurium. *Ann Clin Microbiol Antimicrob.* 2017;16: 1–9.  
509 doi:10.1186/s12941-017-0237-6
- 510 27. Yu YP, Gong T, Jost G, Liu WH, Ye DZ, Luo ZH. Isolation and characterization of five  
511 lytic bacteriophages infecting a *Vibrio* strain closely related to *Vibrio owensii*. *FEMS*  
512 *Microbiol Lett.* 2013;348: 112–119. doi:10.1111/1574-6968.12277
- 513 28. Kabiswa W, Nanteza A, Tumwine G, Majalija S. Phylogenetic Groups and Antimicrobial  
514 Susceptibility Patterns of *Escherichia coli* from Healthy Chicken in Eastern and Central  
515 Uganda. *J Vet Med.* 2018;2018: 1–6. doi:10.1155/2018/9126467
- 516 29. Bashahun D, Odoch T. Assessment of antibiotic usage in intensive poultry farms in  
517 Wakiso District, Uganda. *Livest Res Rural Dev.* 2015;27.
- 518 30. Mukonzo JK, Namuwenge PM, Okure G, Mwesige B, Namusisi OK, Mukanga D. Over-

- 519 the-counter suboptimal dispensing of antibiotics in Uganda. *J Multidiscip Healthc.* 2013;6:  
520 303–310. Available:  
521 <https://www.ncbi.nlm.nih.gov/pmc/articles/PMC3753154/>  
522 [http://www.embase.com/se](http://www.embase.com/search/results?subaction=viewrecord&from=export&id=L369633110%5Cnhttp://www.dovepress.com/getfile.php?fileID=17211%5Cnhttp://dx.doi.org/10.2147/JMDH.S49075%5Cnhttp://sfx.hul.har)  
523 [http://www.dove](http://www.dovepress.com/getfile.php?fileID=17211%5Cnhttp://dx.doi.org/10.2147/JMDH.S49075%5Cn)  
524 <http://sfx.hul.har>
- 525 31. Dou X, Gong J, Han X, Xu M, Shen H, Zhang D, et al. Characterization of avian  
526 pathogenic *Escherichia coli* isolated in eastern China. *Gene.* 2016;576: 244–248.  
527 doi:10.1016/j.gene.2015.10.012
- 528 32. Solà-Ginés M, Cameron-Veas K, Badiola I, Dolz R, Majó N, Dahbi G, et al. Diversity of  
529 multi-drug resistant avian pathogenic *Escherichia coli* (APEC) Causing outbreaks of  
530 colibacillosis in broilers during 2012 in Spain. *PLoS One.* 2015;10: 1–14.  
531 doi:10.1371/journal.pone.0143191
- 532 33. Asadi A, Salehi TZ, Jamshidian M, Ghanbarpour R. ECOR phylotyping and  
533 determination of virulence genes in *Escherichia coli* isolates from pathological conditions  
534 of broiler chickens in poultry slaughter- houses of southeast of Iran. *Vet Res Forum.*  
535 2018;9: 211–216. doi:10.30466/vrf.2018.30827
- 536 34. Coura FM, Diniz SA, Silva MX, Arcebismo TLM, Minharro S, Feitosa ACF, et al.  
537 Phylogenetic Group of *Escherichia coli* Isolates from Broilers in Brazilian Poultry  
538 Slaughterhouse. *Sci World J.* 2017;2017. doi:10.1155/2017/5898701
- 539 35. Dissanayake DRA, Wijewardana TG, Gunawardena GA, Poxton IR. Distribution of  
540 lipopolysaccharide core types among avian pathogenic *Escherichia coli* in relation to the

- 541 major phylogenetic groups. *Vet Microbiol.* 2008;132: 355–363.  
542 doi:10.1016/j.vetmic.2008.05.024
- 543 36. Kariyawasam S, Scaccianoce JA, Nolan LK. Common and specific genomic sequences of  
544 avian and human extraintestinal pathogenic *Escherichia coli* as determined by genomic  
545 subtractive hybridization. *BMC Microbiol.* 2007;7: 1–8. doi:10.1186/1471-2180-7-81
- 546 37. Picard B, Garcia S, Gouriou S, Duriez P, Brahimi N, Bingen E, et al. The Link between  
547 Phylogeny and Virulence in *Escherichia coli* Extraintestinal Infection †. *Infect Immun.*  
548 1999;67: 546–553.
- 549 38. Ewers C, Janßen T, Kießling S, Philipp HC, Wieler LH. Molecular epidemiology of avian  
550 pathogenic *Escherichia coli* (APEC) isolated from colisepticemia in poultry. *Vet*  
551 *Microbiol.* 2004;104: 91–101. doi:10.1016/j.vetmic.2004.09.008
- 552 39. Collingwood C, Kemmett K, Williams N, Wigley P. Is the concept of avian pathogenic  
553 *Escherichia coli* as a single pathotype fundamentally flawed? *Front Vet Sci.* 2014;1: 1–4.  
554 doi:10.3389/fvets.2014.00005
- 555 40. Kemmett K, Humphrey T, Rushton S, Close A, Wigley P, Williams NJ. A Longitudinal  
556 Study Simultaneously Exploring the Carriage of APEC Virulence Associated Genes and  
557 the Molecular Epidemiology of Faecal and Systemic *E. coli* in Commercial Broiler  
558 Chickens. *PLoS One.* 2013;8. doi:10.1371/journal.pone.0067749
- 559 41. Kuhnert P, Boerlin P, Frey J. Target genes for virulence assessment of *Escherichia coli*  
560 isolates from water, food and the environment. *FEMS Microbiology Reviews.* 2000. pp.  
561 107–117. doi:10.1016/S0168-6445(99)00034-0

- 562 42. Azeem T, Abid SA, Ahmad W, Aslam A, Sohail ML. Host immune responses and  
563 vaccination against avian pathogenic *Escherichia coli*. *World's Poult Sci.* 2017;73: 29–44.  
564 doi:10.1017/S0043933916000866
- 565 43. Mbangi J, Nyararai YO. Virulence gene profiles of avian pathogenic *Escherichia coli*  
566 isolated from chickens with colibacillosis in Onderstepoort J Vet Res. 2015;82: 1–8.  
567 doi:10.4102/ojvr.v82i1.850
- 568 44. Delicato ER, Guimarães B, Brito D, Carlos L, Gaziri J, Vidotto MC. Virulence-associated  
569 genes in *Escherichia coli* isolates from poultry with colibacillosis. *Vet Microbiol.*  
570 2003;94: 97–103. doi:10.1016/S0378-1135(03)00076-2
- 571 45. Barnes HJ, Nolan LK, Vaillancourt J-P. Colibacillosis. 12th ed. In: Saif YM, Fadly AM,  
572 Glisson JR, McDougald LR, Nolan LK, Swayne DE, editors. *Diseases of Poultry*. 12th ed.  
573 Blackwell Publishing; 2008. pp. 691–732.
- 574 46. Johnson, Siek KE, Johnson SJ, Nolan LK, Acteriol JB. DNA Sequence of a ColV Plasmid  
575 and Prevalence of Selected Plasmid-Encoded Virulence Genes among Avian *Escherichia*  
576 *coli* Strains. *J Bacteriol.* 2006;188: 745–758. doi:10.1128/JB.188.2.745
- 577 47. Rodriguez-Siek KE, Giddings C, Doetkott C, Johnson TJ, Nolan LK. Characterizing the  
578 APEC pathotype. *vet Res.* 2004;35: 467–483. doi:10.1051/vetres
- 579 48. Paixão AC, Ferreira AC, Fontes M, Themudo P, Albuquerque T, Soares MC, et al.  
580 Detection of virulence-associated genes in pathogenic and commensal avian *Escherichia*  
581 *coli* isolates. *Poult Dis.* 2016;95: 1646–1652.
- 582 49. Riaz MA, Aslam A, Rehman M, Yaqub T. Pathological Investigation and Molecular

- 583           Detection of Avian Pathogenic E . coli Serogroups in Broiler Birds. J Vet Sci Technol.  
584           2016;7: 5–9. doi:10.4172/2157-7579.1000373
- 585   50.   Naghizadeh M, Amir M, Torshizi K, Rahimi S, Dalgaard TS. Synergistic effect of phage  
586           therapy using a cocktail rather than a single phage in the control of severe colibacillosis in  
587           quails. Poult Sci. 2018;0: 1–11.
- 588   51.   Lu Z, Breidt F, Fleming HP, Altermann E, Klaenhammer TR. Isolation and  
589           characterization of a Lactobacillus plantarum bacteriophage, ΦJL-1, from a cucumber  
590           fermentation. Int J Food Microbiol. 2003;84: 225–235. doi:10.1016/S0168-  
591           1605(03)00111-9
- 592   52.   Hyman P. Phages for Phage Therapy : Isolation , Characterization , and Host Range  
593           Breadth. Pharmaceuticals. 2019;12. doi:10.3390/ph12010035
- 594   53.   Shende RK, Hirpurkar SD, Sannat C, Rawat N, Pandey V. Isolation and characterization  
595           of bacteriophages with lytic activity against common bacterial pathogens. Vet World.  
596           2017;10: 973–978. doi:10.14202/vetworld.2017.973-978
- 597
- 598
- 599
- 600
- 601
- 602

603

## 604 **Supporting information**

605 **S1 Table. Host Range. Sensitivity patterns of the seven phages on the 14 APEC isolates**

606 **S1 Appendix. PCR protocol for detecting the virulence genes**

607 **S2 Appendix. PCR protocol for determining phylogenetic groups**

608 **S3 Appendix. PCR protocol for detection of APEC serotypes**

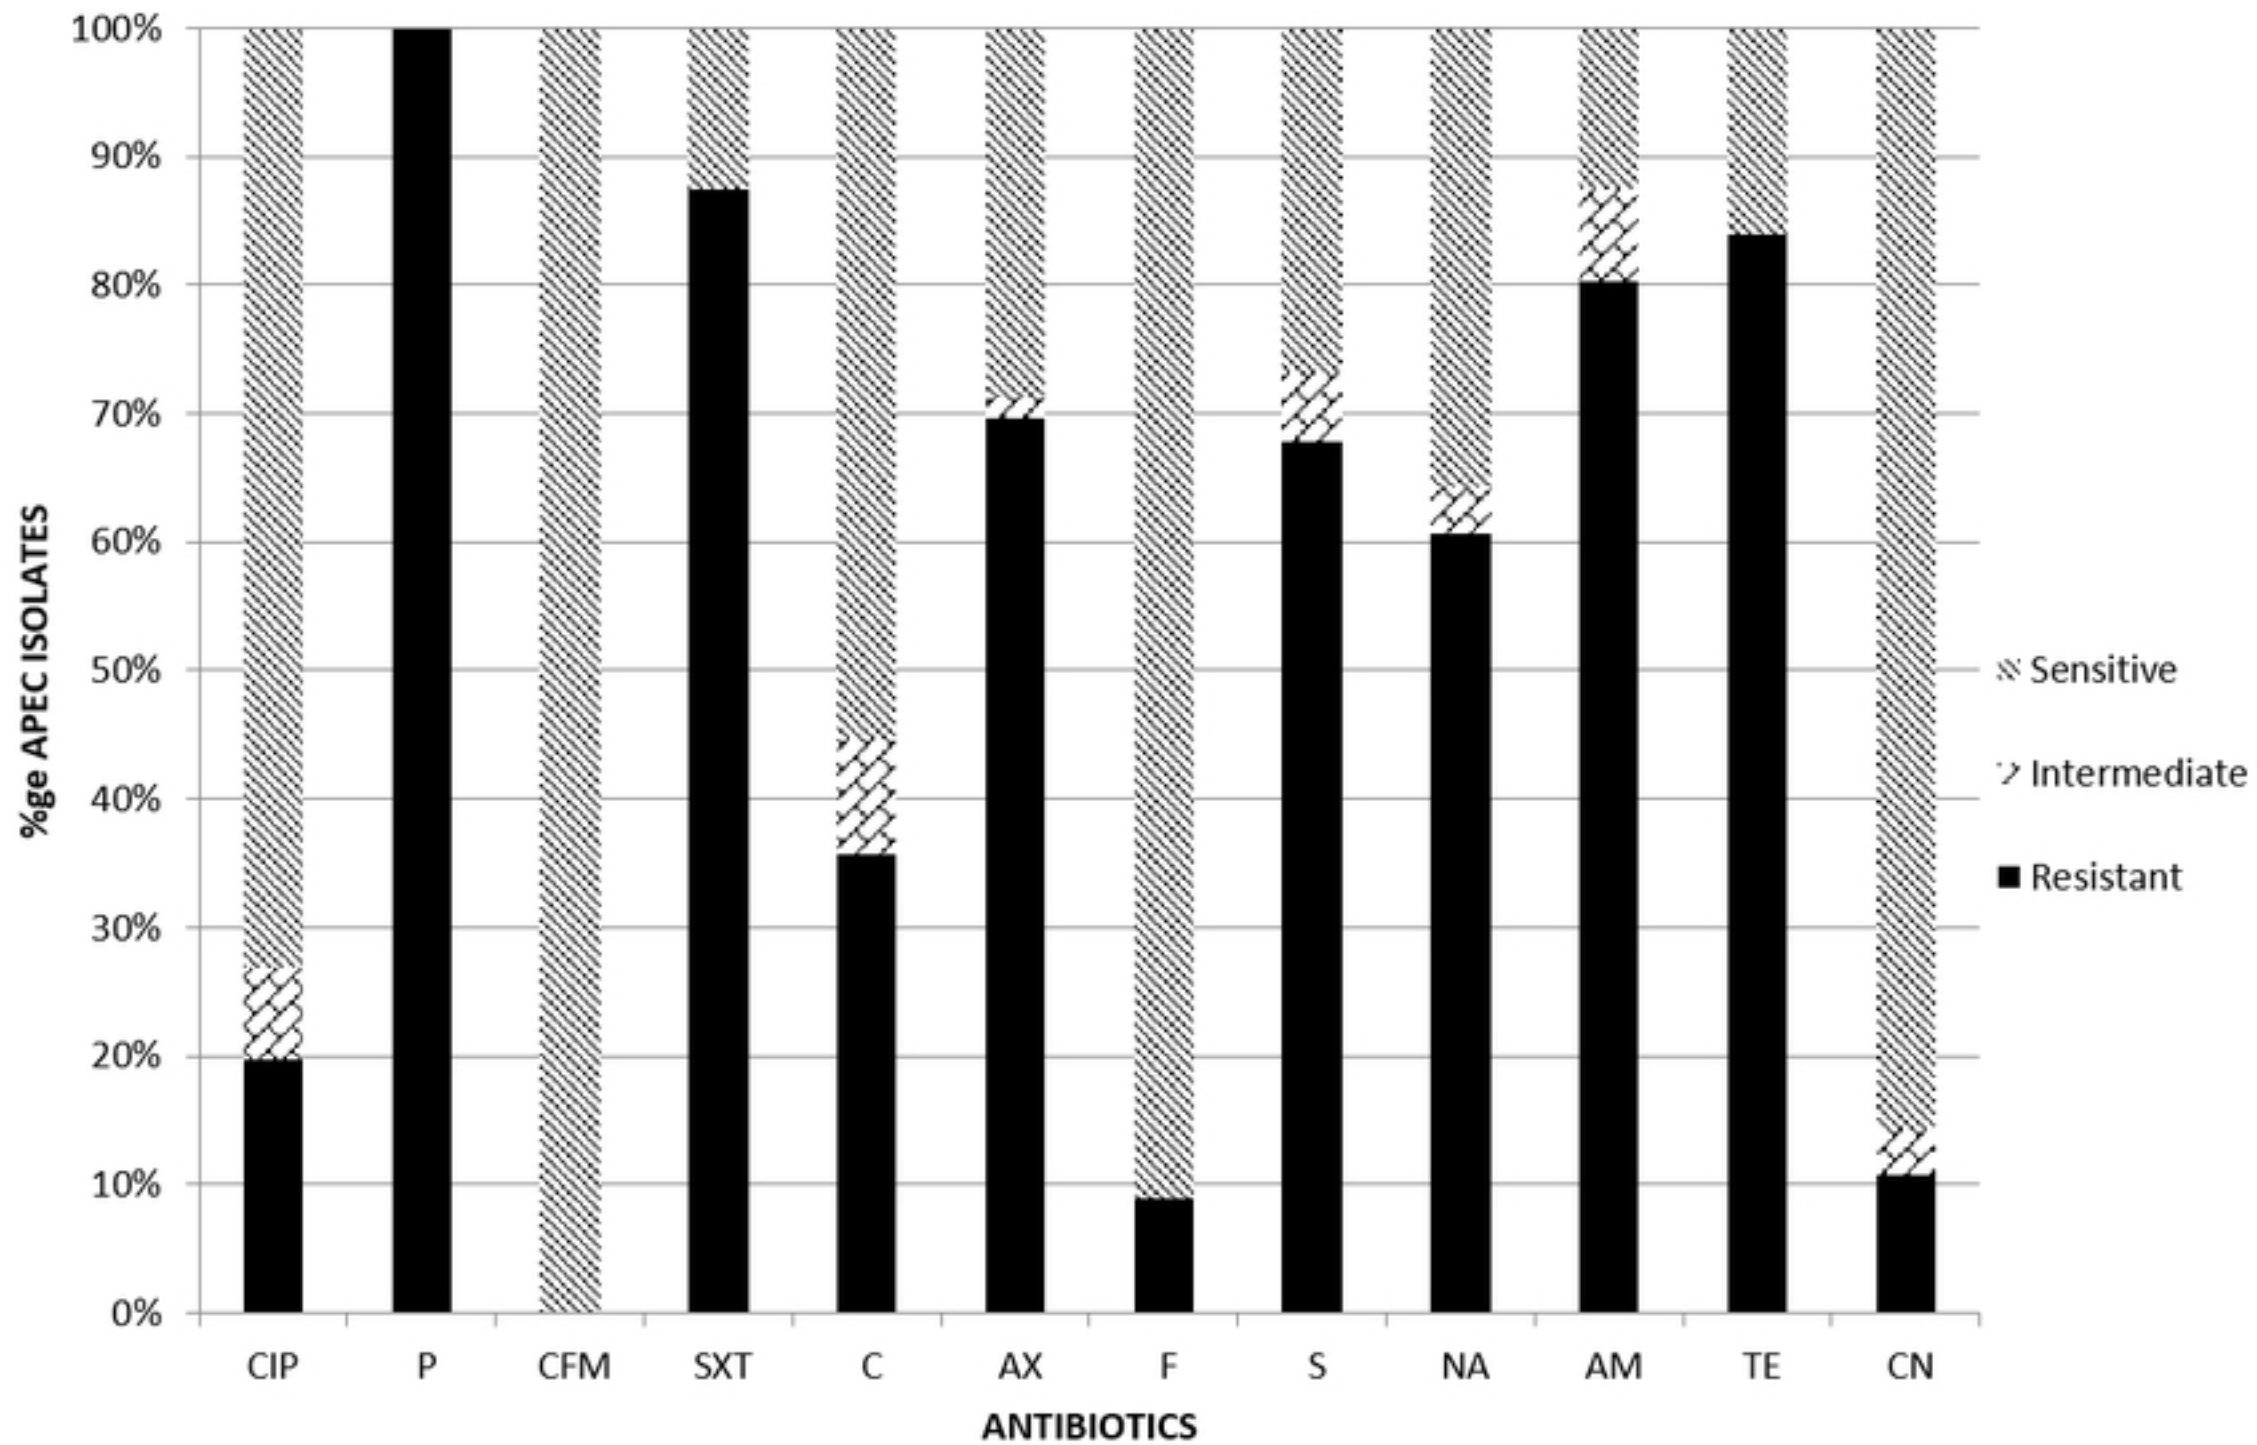

Fig. 1 Antimicrobial susceptibility test results for Avian Pathogen

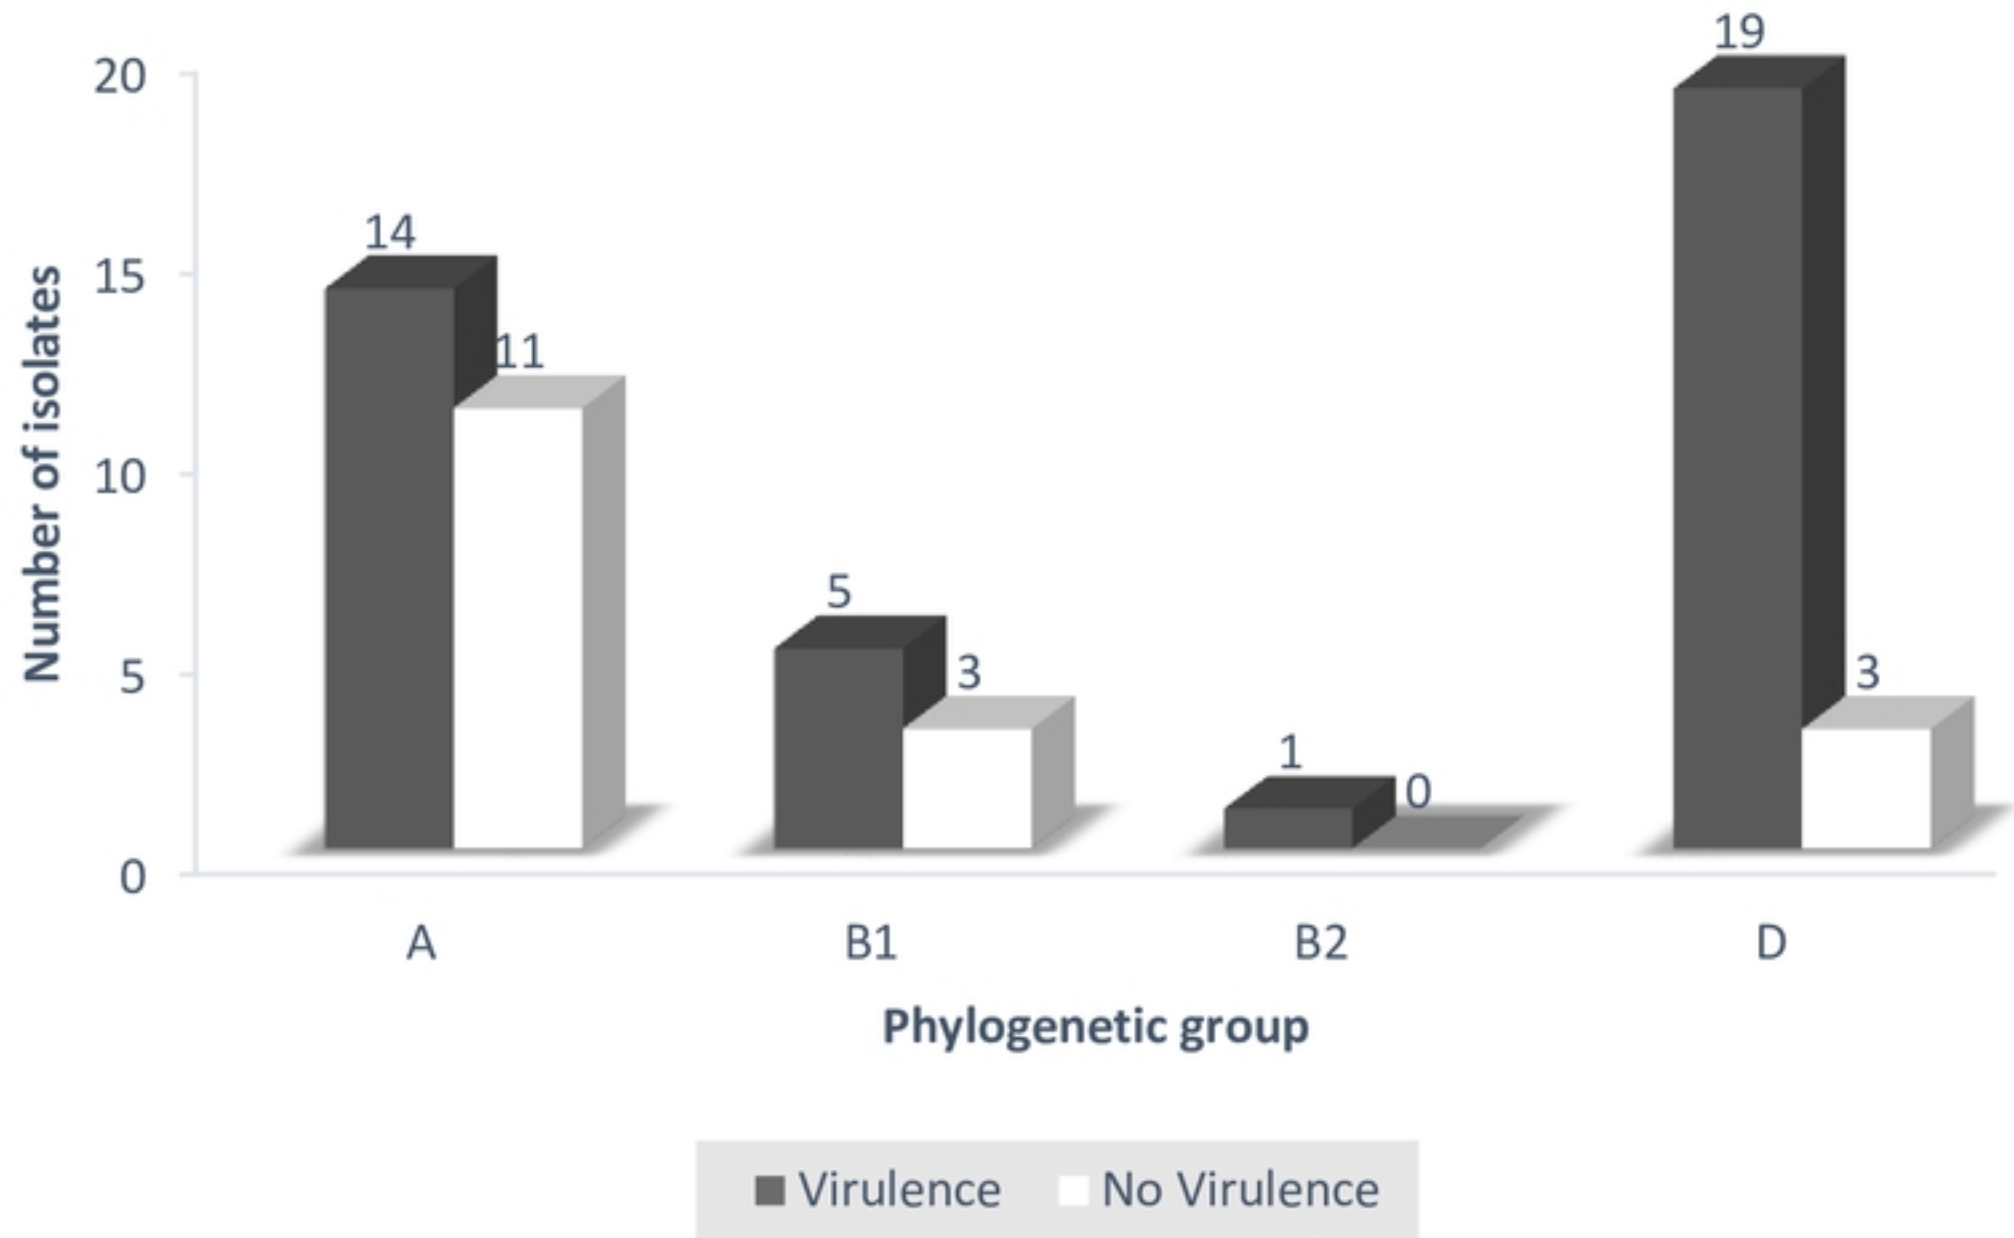

Fig 2. Virulence gene content of APEC isolates within each phylog



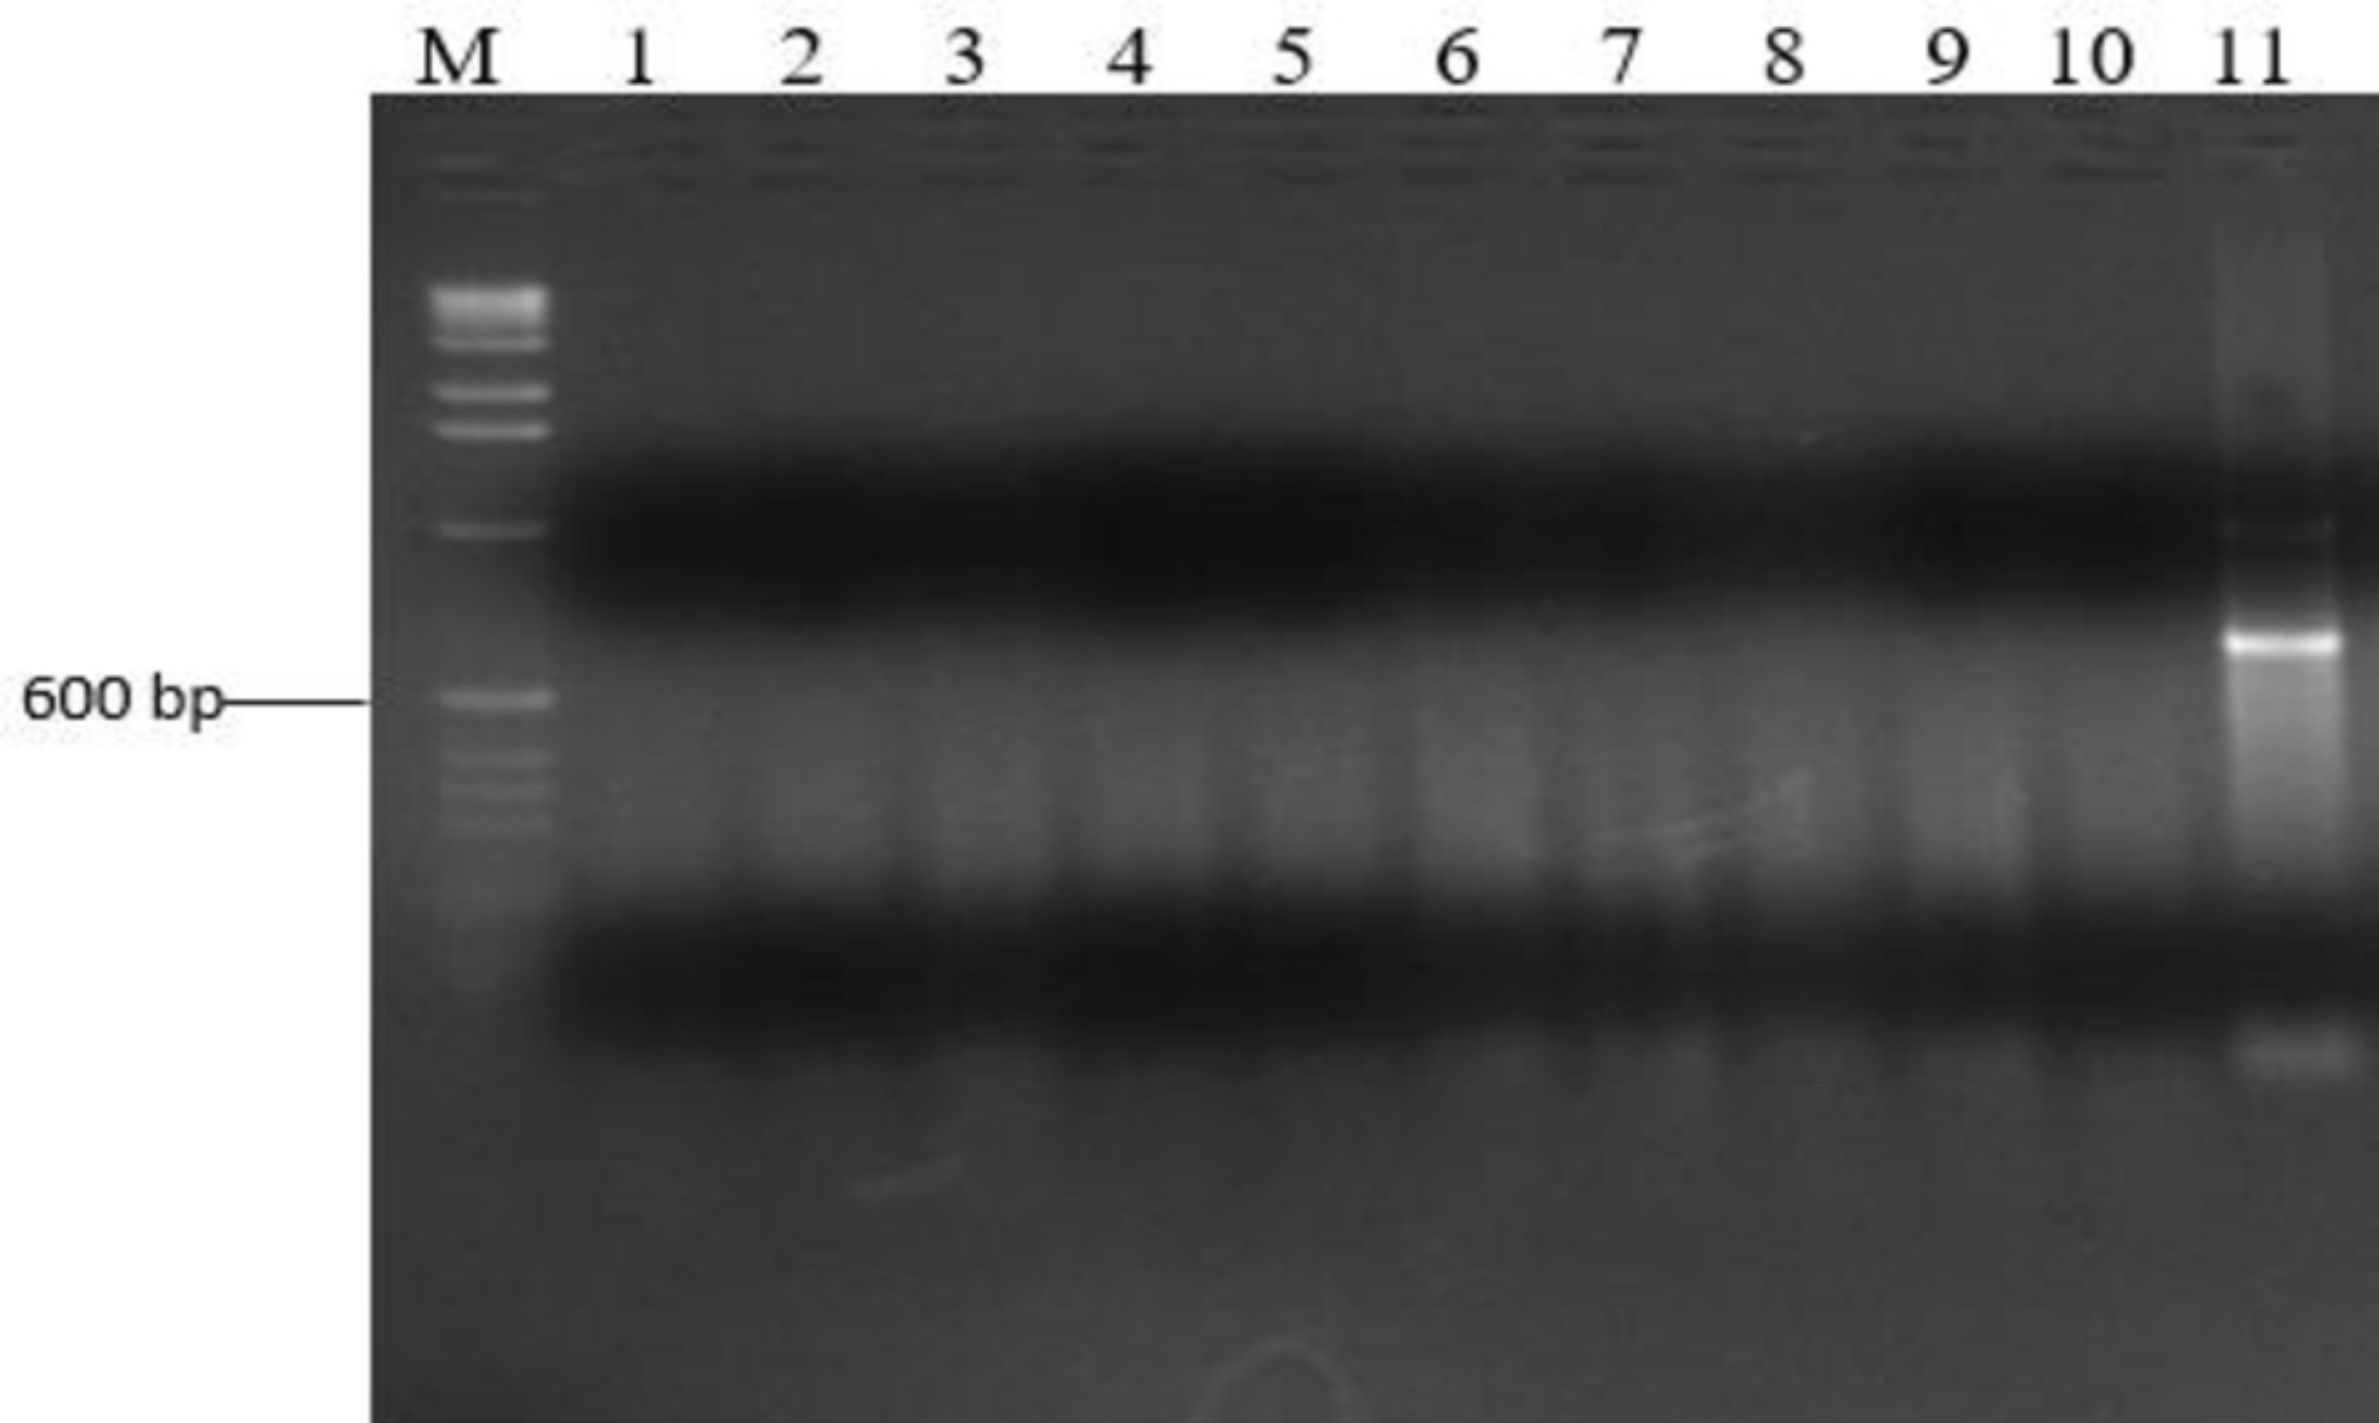

Fig 3. Agarose gel showing PCR amplicons from selected APEC is

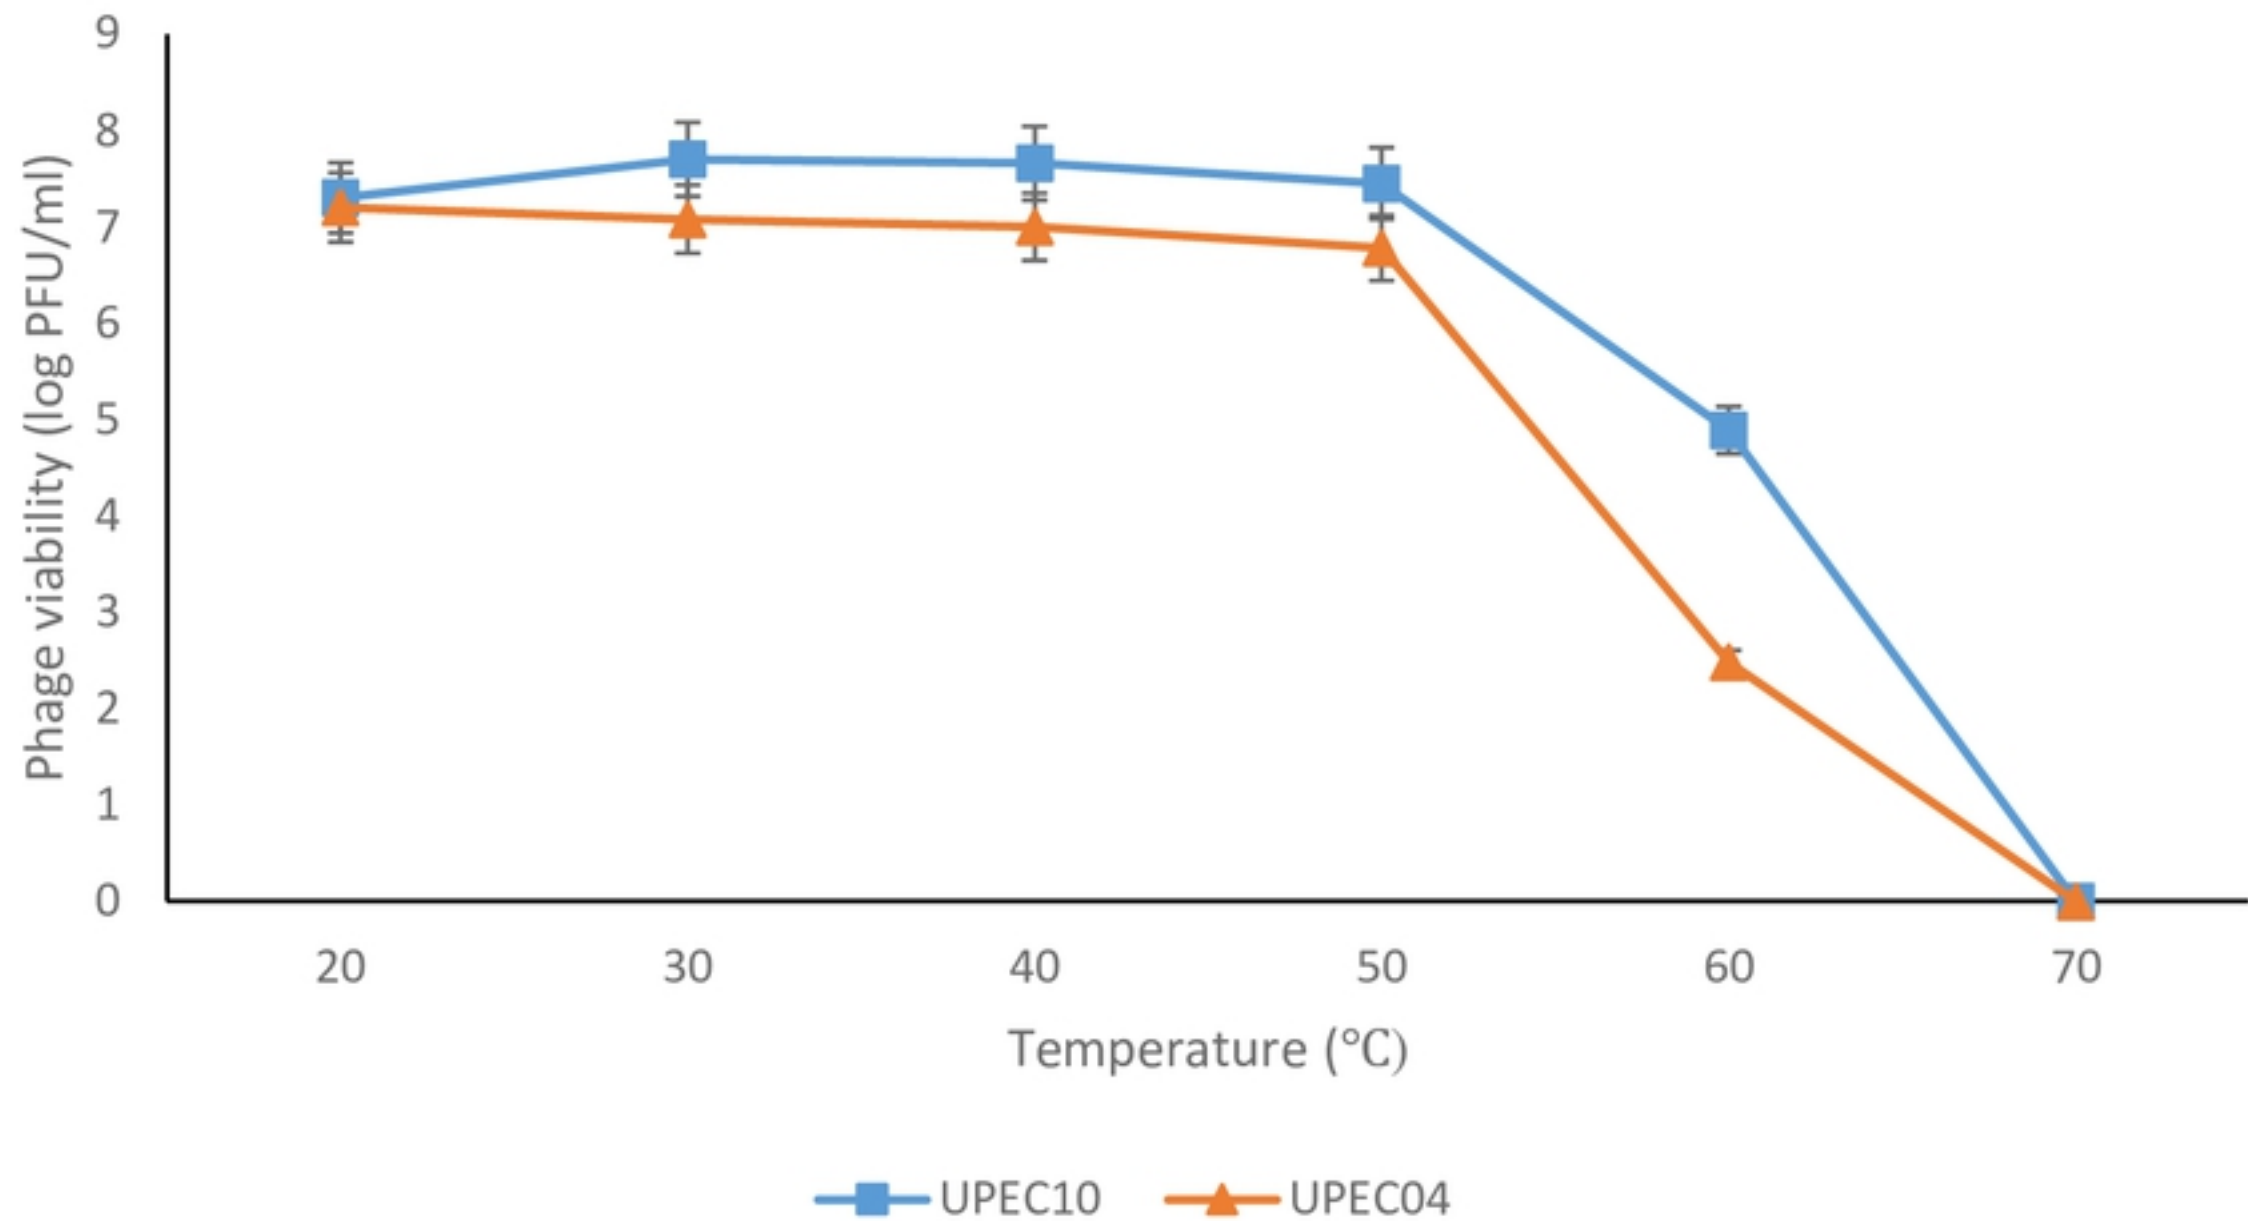

Fig 4. Effect of temperature on UPEC04 and UPEC10 phage viability

A

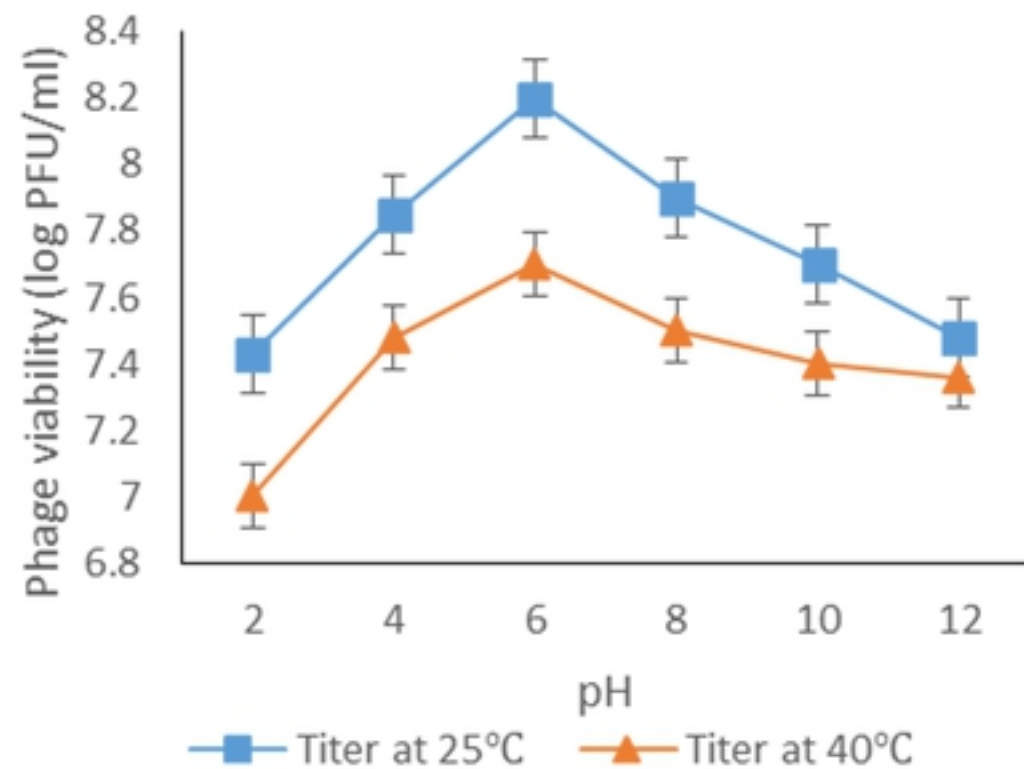

B

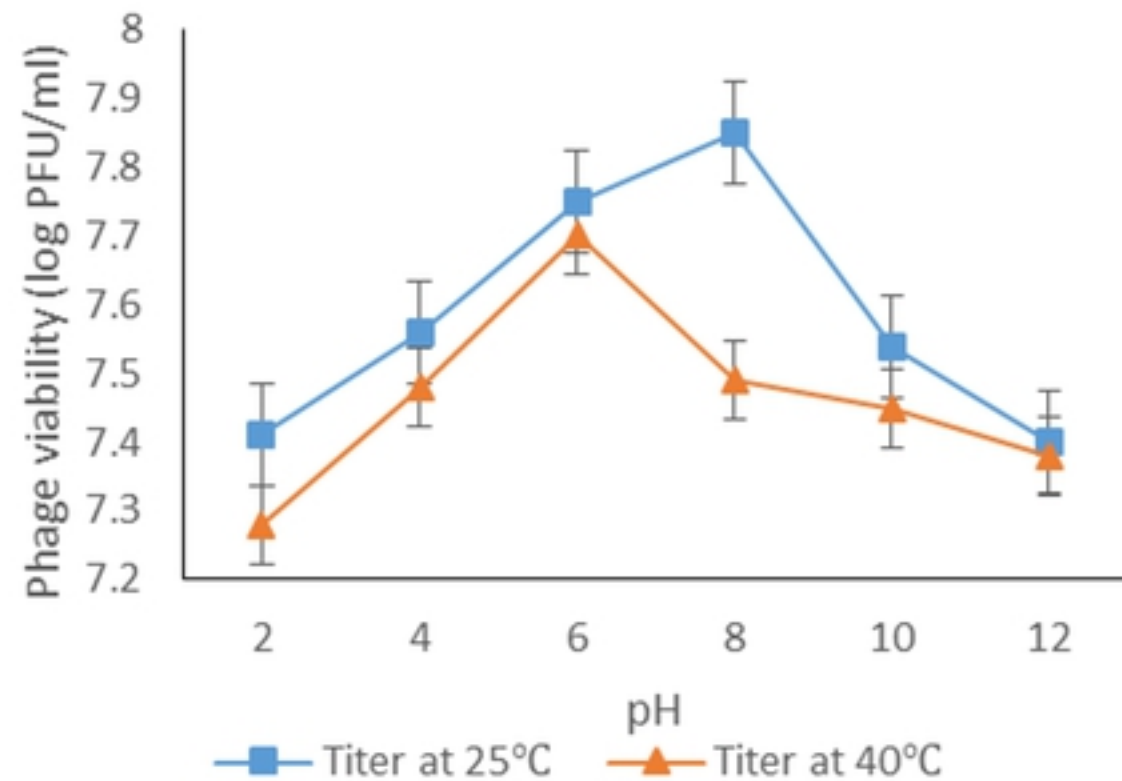

Fig 5. Effect of pH on phage viability at 25°C and 40°C
